# Supplementary material for: Perspectives on Artificial Intelligence–Generated Responses to Patient Messages
Source: PubMed Central journal article supplement (PMC11581642; doi:10.1001/jamanetworkopen.2024.38535), 2024-10-16
Supplement: jamanetwopen-e2438535-s002.pdf [file jamanetwopen-e2438535-s002.pdf]

## Data Sharing Statement

Kim. Perspectives on Artificial Intelligence-Generated Responses to Patient Messages. *JAMA Netw Open*. Published October 14, 2024. doi:10.1001/jamanetworkopen.2024.38535

### Data

**Data available:** Yes

**Data types:** Data (not involving human participants)

**How to access data:** All the LLMs responses will be shared upon reasonable request to corresponding author at the time of publication.

**When available:** With publication

### Supporting Documents

**Document types:** None

### Additional Information

**Who can access the data:** The data will be shared with anyone who are interested in, yet with reasonable request.

**Types of analyses:** The data will be shared with anyone who are interested in, yet with reasonable request and purposes.

**Mechanisms of data availability:** With investigator support.
